# Supplementary material
Source: HighWire-hosted journal article supplement (http://ghspjournal.org/highwire/filestream/3496/field_highwire_adjunct_files/0/19-00393-Schwarz-Supplement_1.pdf)
Supplement: 19-00393-Schwarz-Supplement_1.pdf [file 19-00393-Schwarz-Supplement_1.pdf]

**Supplementary File 1.** Costing Methods and Definitions Used in Community Health Worker Pilot Program, Nepal

| <b>Programmatic Information</b>         | <b>Description</b>                                                                                      | <b>Rationale</b>                                                                                        | <b>Data Source</b>                                                                                                 |
|-----------------------------------------|---------------------------------------------------------------------------------------------------------|---------------------------------------------------------------------------------------------------------|--------------------------------------------------------------------------------------------------------------------|
| Population and number of households     | Population and number of households of Sanfebagar and Kamalbazaar disaggregated by wards                | To identify costs per capita of delivering the program at the municipal and ward level                  | National census 2011 and data available from continuous surveillance                                               |
| Number of beneficiaries                 | Number of unique individuals who were provided direct care by a CHW in the given period                 | To identify costs per beneficiary of all individual programs at municipal and ward level                | <i>CommCare</i> data collected by CHWs during routine care                                                         |
| Number of encounters                    | Number of encounters by a CHW for one of the programs or household surveillance                         | To identify the time spent by CHWs on individual programs and to calculate capacity costs               | The program notes and forms filled out by CHWs in <i>CommCare</i>                                                  |
| Number of events                        | Number of hub meetings, training days and supervision field visits                                      | To identify events relating to design elements and estimate time spent on specific events               | Review of program workflows, calendars, and staff operations                                                       |
| <b>Cost Description</b>                 | <b>Description</b>                                                                                      | <b>Allocation Metric</b>                                                                                | <b>Data Source</b>                                                                                                 |
| Compensation of CHWs                    | Total annual compensation inclusive of base salary, allowances, retirement benefits                     | CHW time spent on programs and proportionate allocation of remainder time across programs               | Average time required to fill out specific forms on <i>CommCare</i> for each CHW                                   |
| Compensation of CHNs and CHPA/s         | Total annual compensation inclusive of base salary, allowances, retirement benefits, external trainings | CHN and CHPA time spent on program supervision as well as other design elements                         | Review of workflows, calendars, and financial details via financial records                                        |
| Other direct expenses                   | Medical consumables, lab reagents and depreciation of medical equipment                                 | Actual usage of consumables and lab reagents; depreciation of equipment for 5 years of useful life      | Consumables, reagents and equipment allocations as recorded in inventory management platform and financial records |
| Indirect expenses                       | Staff benefits, jeep rentals, depreciation of digital tools, network expenses and other admin expenses  | Number of field visits related to care delivery; allocation by personnel for benefits and digital tools | Via financial records                                                                                              |
| <b>Administrative Function</b>          | <b>Description</b>                                                                                      | <b>Allocation Metric</b>                                                                                | <b>Data Source</b>                                                                                                 |
| Planning and administration             | Costs related to building program calendars, managing logistics, and stakeholder engagement             | Intermediate allocations by CHW, CHN and CHPA time allocation, final allocation by CHW encounters       | Review of program workflows, calendars, and staff operations                                                       |
| Training                                | Costs related to trainings during hub meetings as well as quarterly programmatic trainings              | Intermediate allocations by CHW, CHN and CHPA time allocation, final allocation by CHW encounters       | Review of program workflows, calendars, and staff operations                                                       |
| Supervision, monitoring, and evaluation | Costs related to on the job mentoring, supervision field visits and 1:1 coaching                        | Intermediate allocations by CHW, CHN and CHPA time allocation, final allocation by CHW encounters       | Review of program workflows, calendars, and staff operations                                                       |

Supplement to: Nepal P, Schwarz R, Citrin D, et al. Costing analysis of a pilot community health worker program in rural Nepal. *Glob Health Sci Pract.* 2020;8(2). <https://doi.org/10.9745/GHSP-D-19-00393>

| <b>Programmatic Information</b> | <b>Description</b>                                                                      | <b>Rationale</b>                                                                                  | <b>Data Source</b>                                                               |
|---------------------------------|-----------------------------------------------------------------------------------------|---------------------------------------------------------------------------------------------------|----------------------------------------------------------------------------------|
| Data reporting and learning     | Costs related to usage of digital tools and data learning sessions at hub meetings      | Intermediate allocations by CHW, CHN and CHPA time allocation, final allocation by CHW encounters | Review of program workflows and staff operations                                 |
| Continuous surveillance         | Costs relating to updating of household and demographic information during routine care | CHW time spent on updating demographic and household details, final allocation by encounters      | Average time required to fill out specific forms on <i>CommCare</i> for each CHW |

Abbreviations: CHN, community health nurse; CHPA, community health program associate, CHW, community health worker.
